# Supplementary material for: Photo-controlled Zn2+ release system with dual binding-sites and turn-on fluorescence
Source: Royal Society of Chemistry journal article supplement (doi:10.1039/b917948h), 2009-12-24
Supplement: b917948h.pdf [file b917948h.pdf]

## Supporting Information

### Photo-controlled Zn<sup>2+</sup> Release System with Dual Binding-site and Turn-on Fluorescence

Xu Zhang<sup>[a,b]</sup>, Huan Huan Liu<sup>[a,b]</sup>, Yi Chen\*<sup>[a]</sup>

<sup>a</sup> *Key Laboratory of Photochemical Conversion and Optoelectronic Materials, Technical Institute of Physics and Chemistry, The Chinese Academy of Sciences, Beijing, 100190, China. Fax: 86 10 6256 4049; Tel: 86 10 8254 3595; E-mail: yichencas@yahoo.com.cn*

<sup>b</sup> Graduate School of Chinese Academy of Sciences, Beijing, 100049, People's Republic of China.

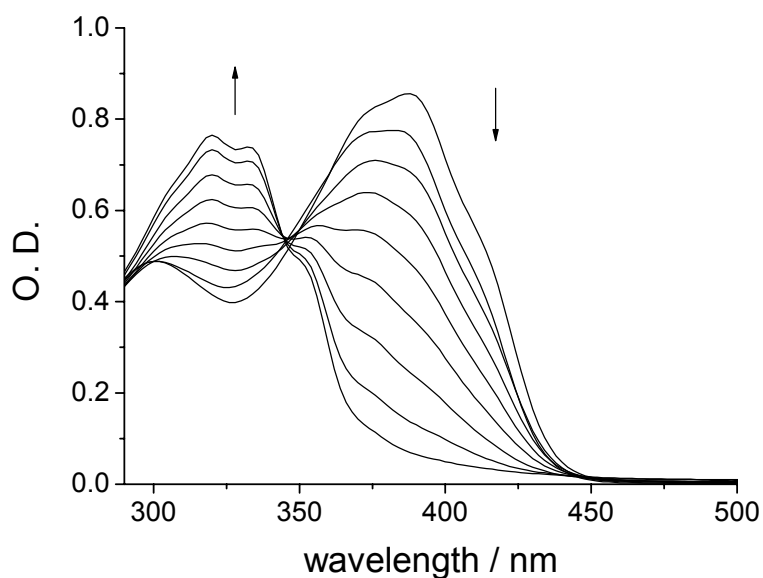

**Fig. 1.** Absorption changes of free ligand **1** upon 365 nm light irradiation in CH<sub>3</sub>CN (25 μM, periods: 0, 6, 12, 18, 24, 30, 36, 42, 48 min).

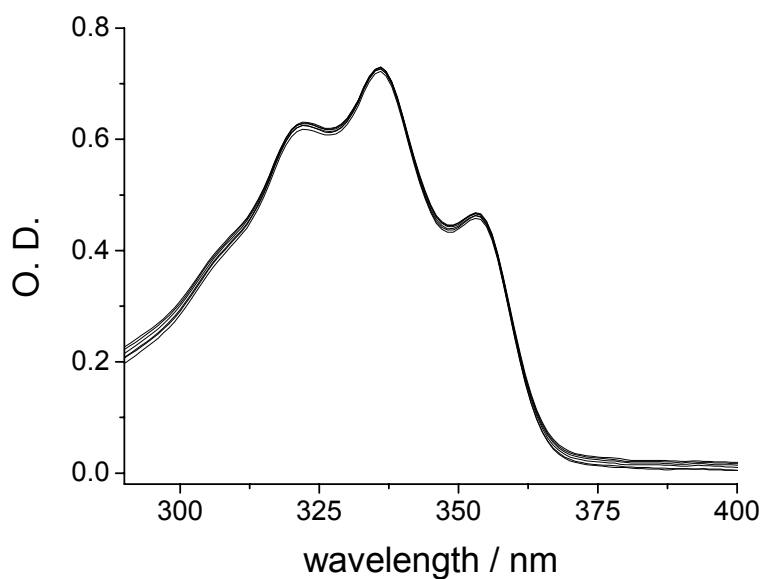

**Fig. 2.** Absorption changes of **compound 2** (20  $\mu\text{M}$ ) upon addition of  $\text{Zn}(\text{OAc})_2$  in  $\text{CH}_3\text{CN}$  (0, 10, 20, 30, 40, 50  $\mu\text{M}$ ).

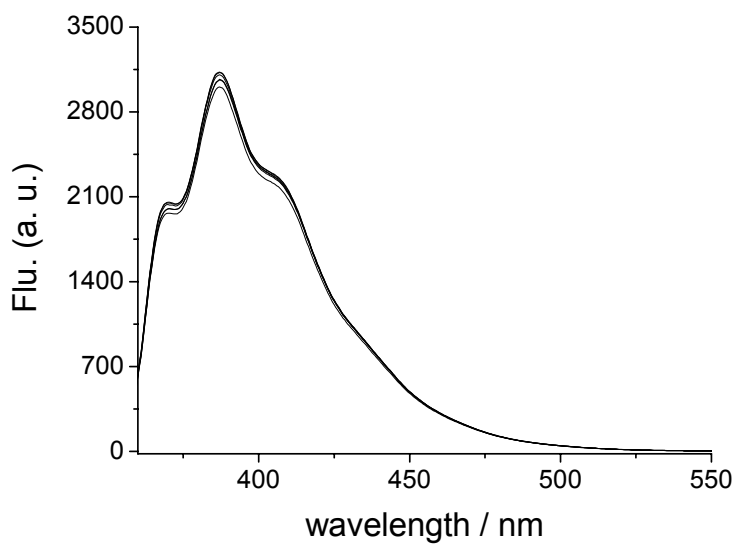

**Fig. 3.** Fluorescence changes of **compound 2** (20  $\mu\text{M}$ ) upon addition of  $\text{Zn}(\text{OAc})_2$  in  $\text{CH}_3\text{CN}$  ( $\lambda_{\text{ex}}$  = 353 nm, periods: 0, 10, 20, 30, 40, 50  $\mu\text{M}$ ).
